# Supplementary material for: Limitations in Wavelet Analysis of Non-Stationary Atmospheric Gravity Wave Signatures in Temperature Profiles
Source: Copernicus journal article supplement (doi:10.5194/amt-2023-240), 2023-12-01
Supplement: Supplementary file [file amt-2023-240-AC2-supplement.pdf]

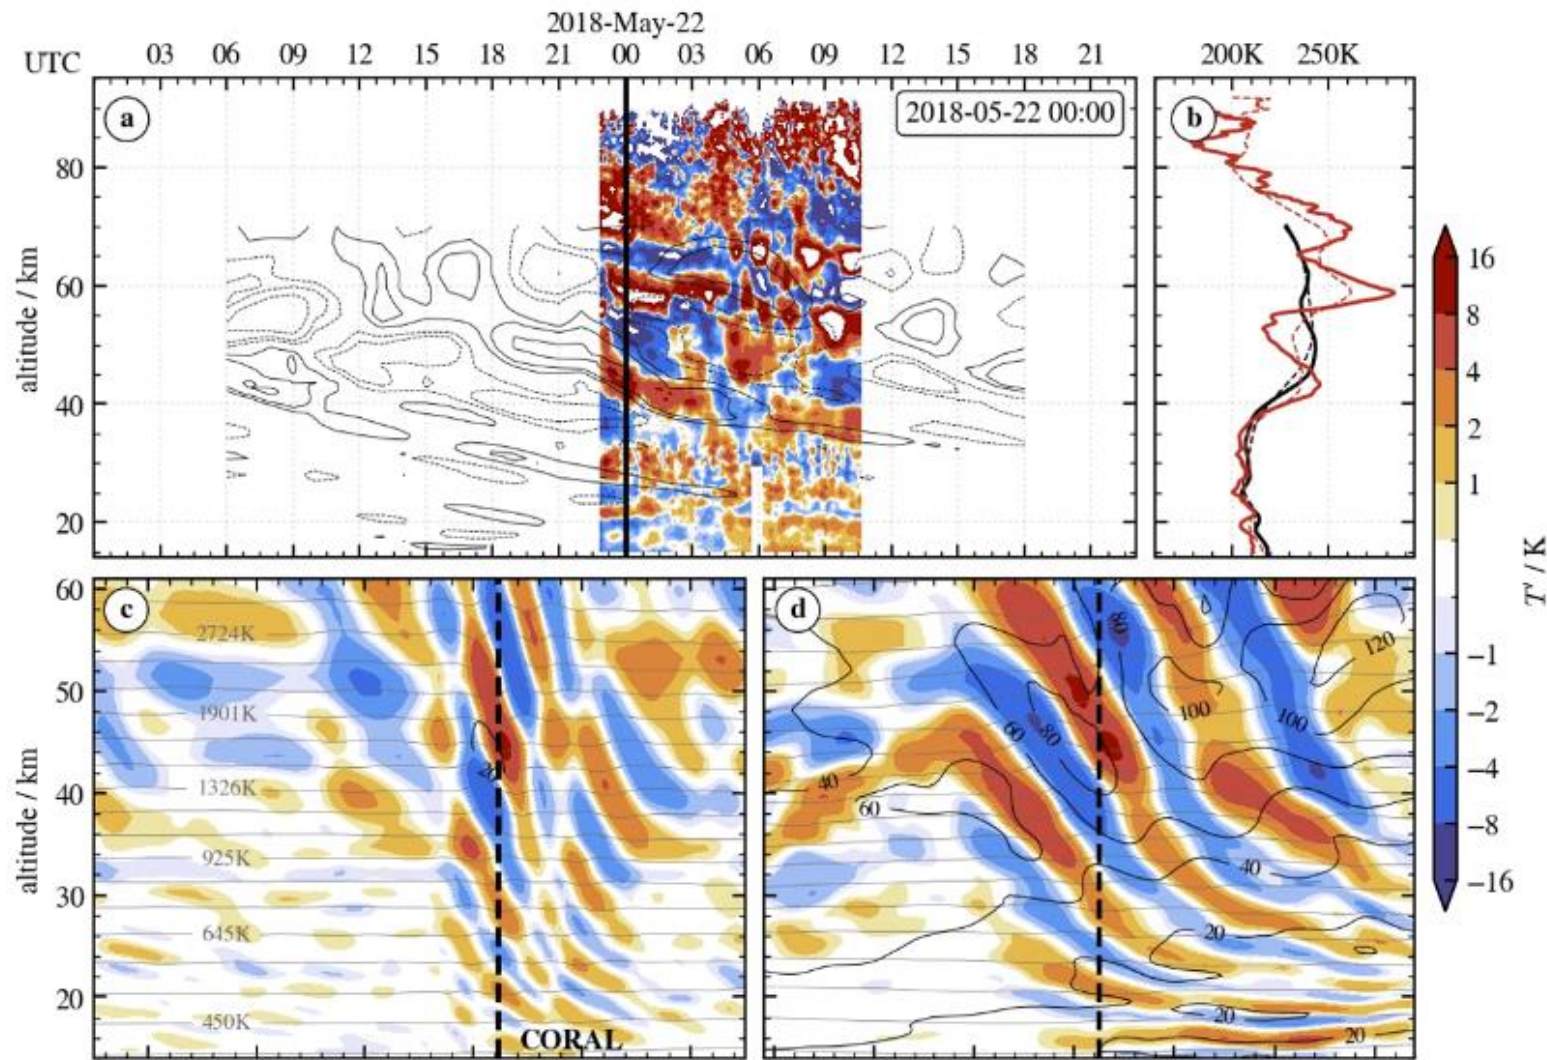

a) Temperature perturbations observed by CORAL on the night of 21-22 May 2018. Contour lines indicate temperature perturbations from ERA5. b) Obtained CORAL (red) and ERA5 (black) temperature profiles at 00UTC. c) Zonal crosssection of ERA5 temperature perturbations. d) Meridional crosssection of ERA5 temperature perturbations. Dashed lines in c) and d) mark the CORAL location.
